# Supplementary material
Source: PubMed Central journal article supplement (PMC6420704)

## The role of IFIT5 in RCC cell invasion

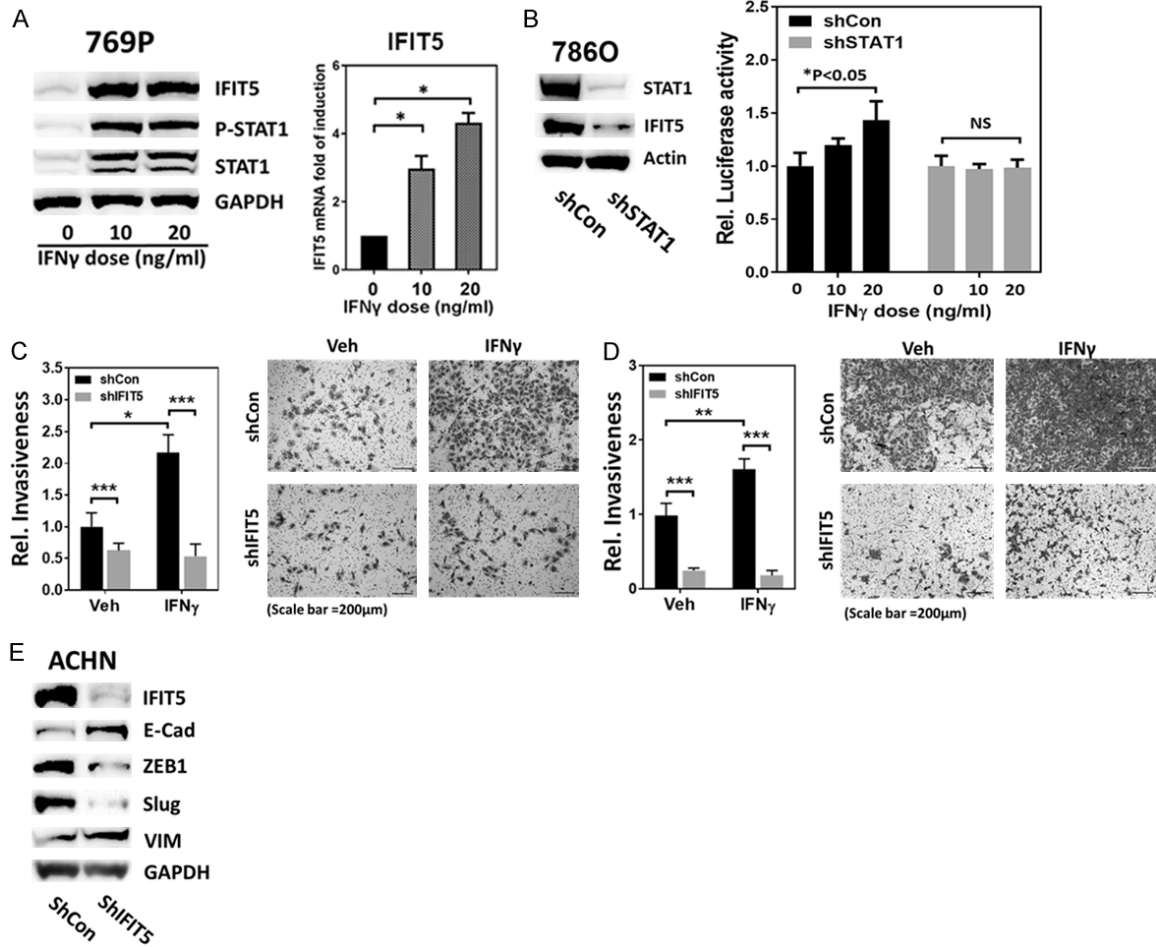

**Figure S1.** A. Dose-dependent elevation of IFIT5 protein and mRNA level in 769P cells treated with IFN $\gamma$  for 48 hrs, compared to vehicle control. (\* $P < 0.05$ ). B. The impact of STAT1 shRNA knockdown (shSTAT1) on IFIT5 promoter activity using luciferase reporter assay. C. The impact of IFIT5 loss (shIFIT5) on the IFN $\gamma$ -enhanced aggravation of invasiveness in 786O cells, compared to shCon. (\* $P < 0.05$ , \*\*\* $P < 0.00001$ ). D. The impact of IFIT5 loss (shIFIT5) on the IFN $\gamma$ -enhanced aggravation of invasiveness in 769P cells, compared to shCon. (\*\* $P < 0.001$ , \*\*\* $P < 0.00001$ ). E. The impact of IFIT5 shRNA knockdown (shIFIT5) on the protein expression level of E-Cad, ZEB1, Slug and Vimentin (VIM) in ACHN cells, compared to control shRNA (shCon).

The role of IFIT5 in RCC cell invasion

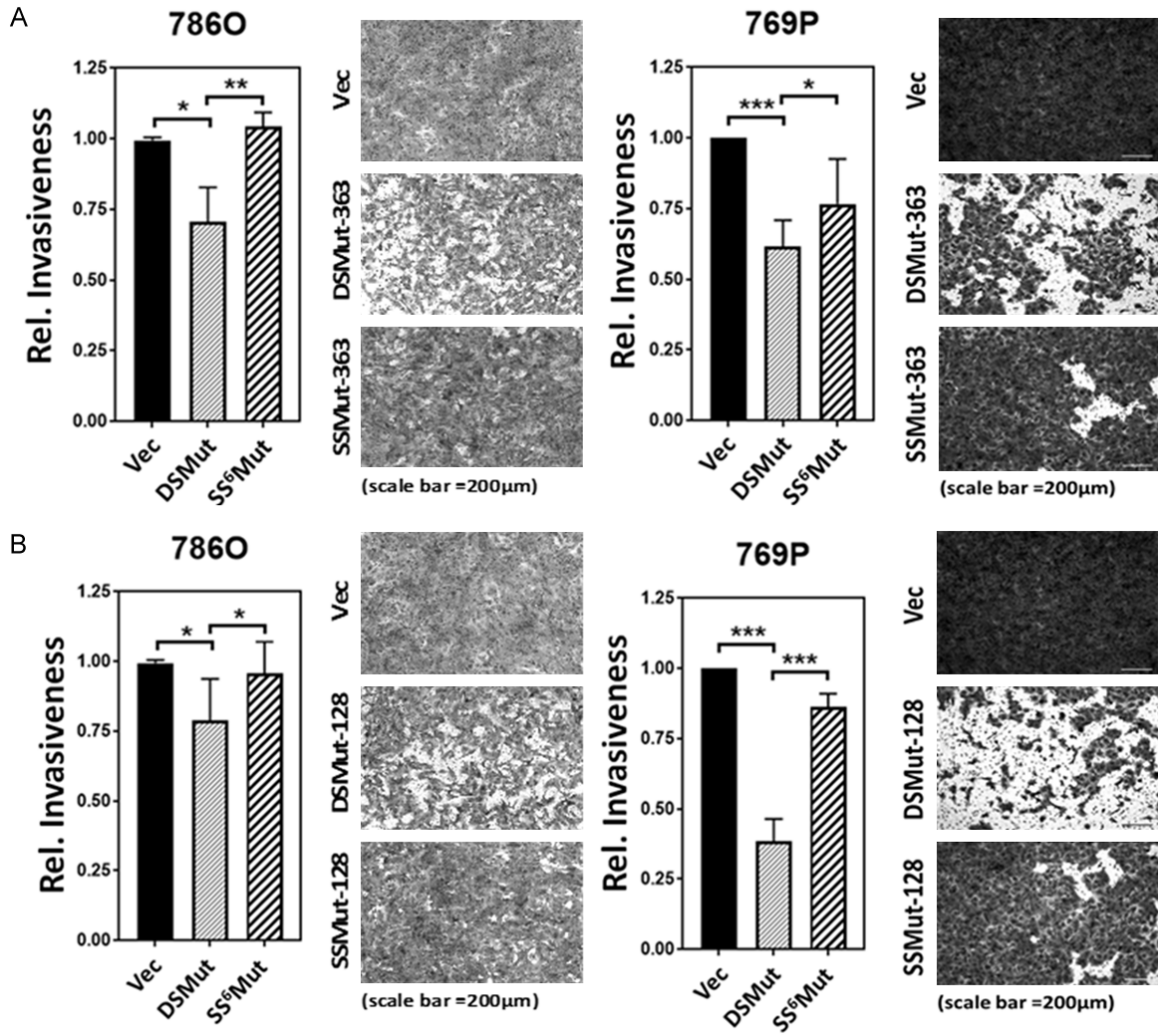

Supplement: ajceu0007-0031-f6.pdf [file ajceu0007-0031-f6.pdf]
